# Supplementary material for: Orbital hybridization states of carbon functionalize the alkali-ion storage capability of hard carbons
Source: Royal Society of Chemistry journal article supplement (doi:10.1039/d2ta08691c), 2023-01-01
Supplement: d2ta08691c1.pdf [file d2ta08691c1.pdf]

## **Orbital Hybridization States of Carbon Function the Alkali-Ion Storage Capability of Hard Carbons**

Ying Yang<sup>a</sup>, Chenli Huang<sup>b</sup>, Ruirui Zhao<sup>a</sup>, Zhonghui Gao<sup>a</sup>, Xiaoqun Qi<sup>a</sup>, Wang Zhang<sup>c</sup>, Xing Lu<sup>b\*</sup>, Long Qie<sup>b\*</sup>, and Yunhui Huang<sup>b\*</sup>

<sup>a</sup>Institute of New Energy for Vehicles, School of Materials Science and Engineering, Tongji University, Shanghai, 201804, China.

<sup>b</sup>State Key Laboratory of Material Processing and Die & Mold Technology, School of Materials Science and Engineering, Huazhong University of Science and Technology, Wuhan, Hubei Province, 430074, China.

<sup>c</sup>Institute for Superconducting and Electronic Materials, University of Wollongong, Wollongong, NSW 2522, Australia.

Y. Ying and C. Huang contributed equally to this work.

\*Corresponding authors. E-mail: lux@hust.edu.cn, qie@hust.edu.cn, and huangyh@hust.edu.cn

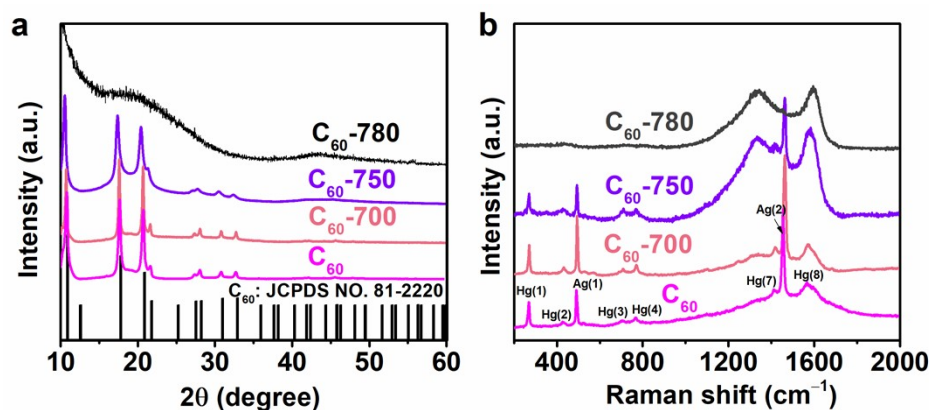

**Fig. S1 The conformation of carbonization temperature for synthesizing HCs. a** The XRD patterns of  $C_{60}$ ,  $C_{60}$ -700,  $C_{60}$ -750, and  $C_{60}$ -780 samples. **b** The Raman spectra of  $C_{60}$ ,  $C_{60}$ -700,  $C_{60}$ -750, and  $C_{60}$ -780 samples.

To find the transforming temperature from  $C_{60}$  to hard carbons, we conduct a series of experiments at various annealing temperatures from 700, 750, 780, 800, 900, to 1000 °C. The XRD patterns and Raman spectra of  $C_{60}$  and  $C_{60}$ -T samples at 700, 750, and 780 °C are added and shown in Fig. S1. It could be seen that all the peaks of  $C_{60}$ ,  $C_{60}$ -700, and  $C_{60}$ -750 (Fig. S1a) are well-matched to the standard XRD pattern of  $C_{60}$  crystal (JCPDS NO. 81-2220), indicating the well maintenance of structure of  $C_{60}$  at temperatures of  $\leq 750$  °C. Similarly, as shown in Fig. S1b, it could be seen that Raman spectra of  $C_{60}$  and  $C_{60}$ -Ts samples at 700 and 750 °C presents the characteristic peaks of  $C_{60}$  such as Hg (eight fivefold-degenerated modes of symmetry) and Ag (two nondegenerate modes of symmetry). [1. *Adv. Mater.* **2017**, 29, 1603414.; 2. *Phil. Trans. R. Soc. Lond. A* **2004**, 362, 2375–2406] But the characteristic peaks of  $C_{60}$  were disappeared in  $C_{60}$ -780 sample. Above all, the  $C_{60}$ -T samples remain the crystal structure of  $C_{60}$  at the carbonization temperatures of  $\leq 750$  °C. However, when the temperature was increased to 780 °C, all the peaks belong to  $C_{60}$  in both the XRD pattern and Raman spectra disappear, indicating the break of the  $C_{60}$  cages and the formation of HCs. So we chose 780 °C as the lowest carbonization temperature for our investigation.

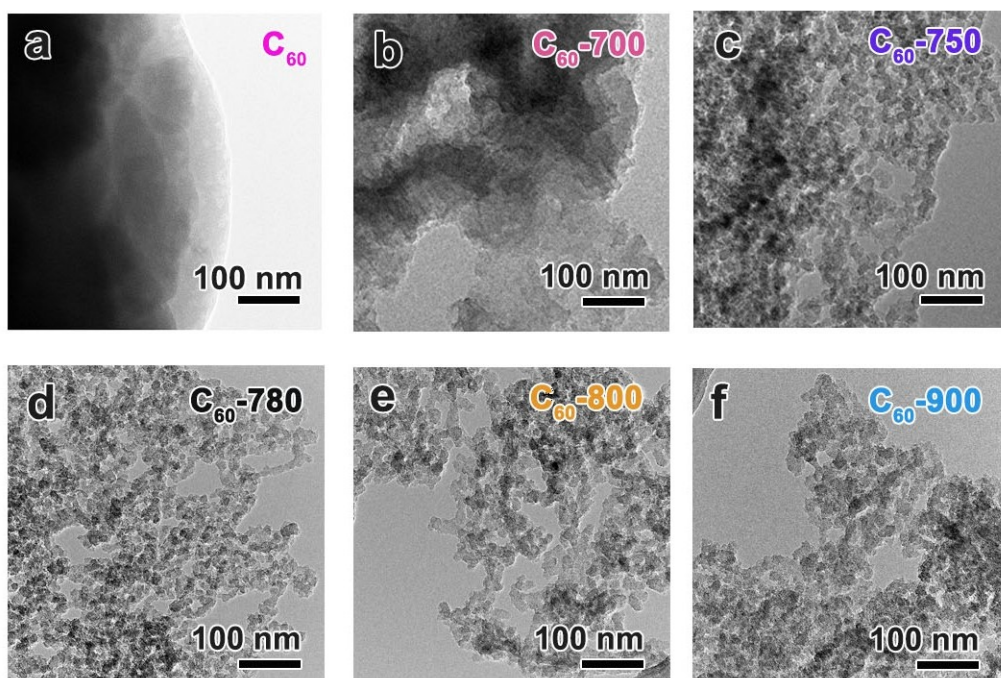

**Fig. S2 The microstructure evolution of  $C_{60}$ -T samples.** The low-magnification TEM images of **a**  $C_{60}$ ; **b**  $C_{60}$ -700; **c**  $C_{60}$ -750; **d**  $C_{60}$ -780; **e**  $C_{60}$ -800; and **f**  $C_{60}$ -900.

To vividly investigate the microstructure evolution of  $C_{60}$  and  $C_{60}$ -Ts, the low-magnification TEM images of from  $C_{60}$  to  $C_{60}$ -900 were shown in Fig. S2. It could be seen that, as shown in Fig. S2a ~ c, there are few pores in  $C_{60}$  indicating the bulk structure, while the  $C_{60}$ -700 and  $C_{60}$ -750 samples gradually exhibit more and more pores due to the slight broken and decomposition of  $C_{60}$ , which is correspond to macro-porous structure appearance of  $C_{60}$ -750 sample. Besides, the cross-linked nanoparticles of 20 to 30 nm seem to become a bit thin from  $C_{60}$ -750 to  $C_{60}$ -780 (Fig. S2c and S2d), which may be attribute to the structure transformation from  $C_{60}$  to hard carbon. However, with the further increase the temperature to 800, the  $C_{60}$ -800 exhibits the particle aggregation, which may be attributed to the reconstruction of carbon structure.

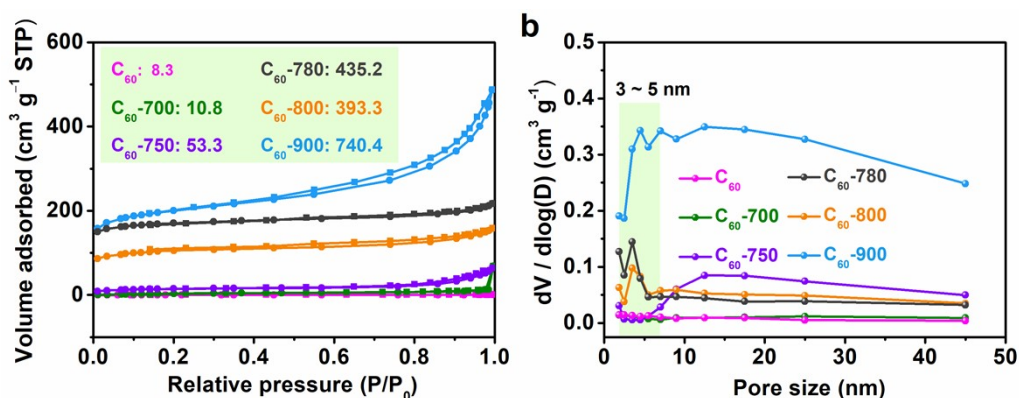

**Fig. S3** The evolution of the specific surface area and pore structure  $C_{60}$ -T samples. **a** Nitrogen adsorption/desorption isotherms and **b** BJH pore size distributions of  $C_{60}$  and  $C_{60}$ -Ts.

Nitrogen adsorption-desorption isotherms were used to examine the evolution of specific surface area (SSA) and pore structure of  $C_{60}$ -Ts with the increase of the pyrolyzed temperature. As shown in Fig. S3a, the SSA of  $C_{60}$ ,  $C_{60}$ -700, and  $C_{60}$ -750 samples gradually increase from 8.3 to 53.3  $m^2 g^{-1}$  (Fig. S3a), and the macro-porous structure gradually appears from  $C_{60}$  to  $C_{60}$ -750 (Fig. S3b). However, when the annealing temperature reached to 780 °C, the SSA of  $C_{60}$ -780 drastically increases to 435.2  $m^2 g^{-1}$  and the macro-porous structure is fully transfer to the mesoporous structure from  $C_{60}$ -750 to  $C_{60}$ -780, which may be attributed to the transformation of the structure from  $C_{60}$  to hard carbon. With the further increase of the carbonization temperature to 800 °C, the SSA of  $C_{60}$ -800 decreases slightly to 393.3  $m^2 g^{-1}$ , which may be attributed to the particle aggregation, which is corresponded to the results of the low-magnification TEM images as shown in Fig. S2.

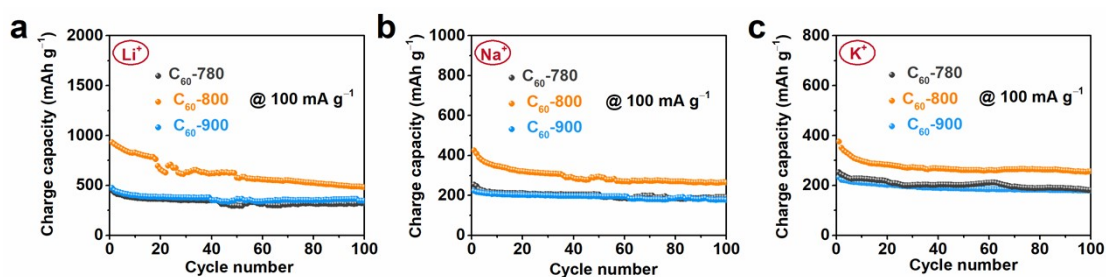

**Fig. S4** The cycling performance of C<sub>60</sub>-Ts (T = 780, 800 and 900 °C) at a current density of 100 mA g<sup>-1</sup> for **a** Li<sup>+</sup>, **b** Na<sup>+</sup>, and **c** K<sup>+</sup> storage.

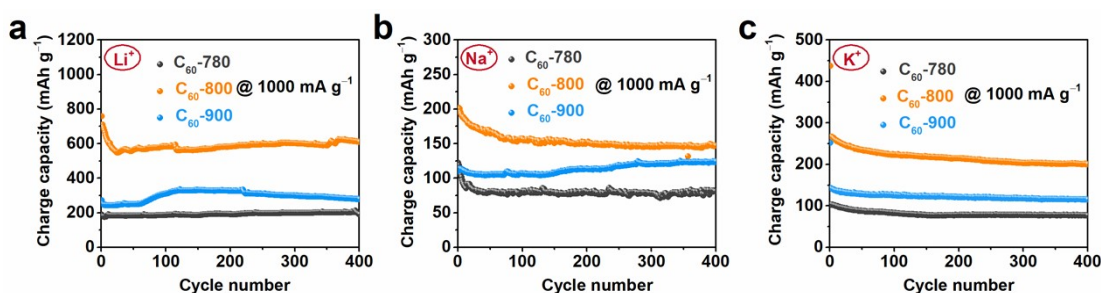

**Fig. S5** The cycle performance of C<sub>60</sub>-T (T = 780, 800 and 900 °C) at a current density of 1000 mA g<sup>-1</sup> for **a** Li<sup>+</sup>, **b** Na<sup>+</sup>, and **c** K<sup>+</sup> storage.

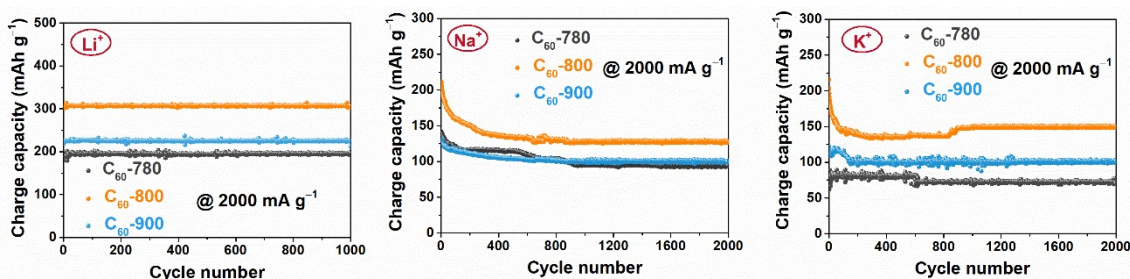

**Fig. S6** The cycle performance of C<sub>60</sub>-T (T = 780, 800 and 900 °C) at a current density of 2000 mA g<sup>-1</sup> for **a** Li<sup>+</sup>, **b** Na<sup>+</sup>, and **c** K<sup>+</sup> storage.

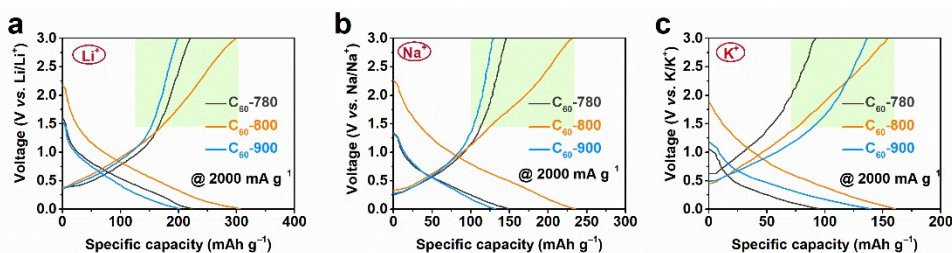

**Fig. S7** The comparison of galvanostatic discharge/charge curves of C<sub>60</sub>-Ts at a current rate of 2000 mA g<sup>-1</sup> for **a** Li<sup>+</sup>, **b** Na<sup>+</sup>, and **c** K<sup>+</sup> storage.

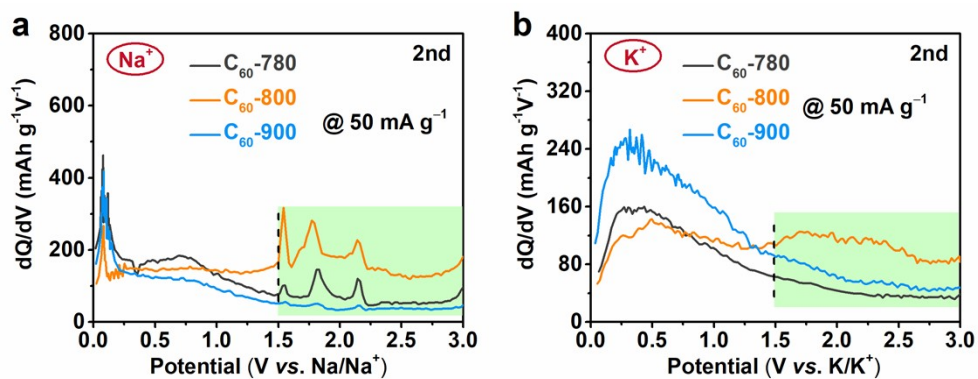

**Fig. S8.** The  $dQ/dV$  curves of  $C_{60}$ -Ts ( $T = 780, 800,$  and  $900$  °C) at the second cycle at  $50 \text{ mA g}^{-1}$  for **a**  $\text{Na}^+$  and **b**  $\text{K}^+$  storage.

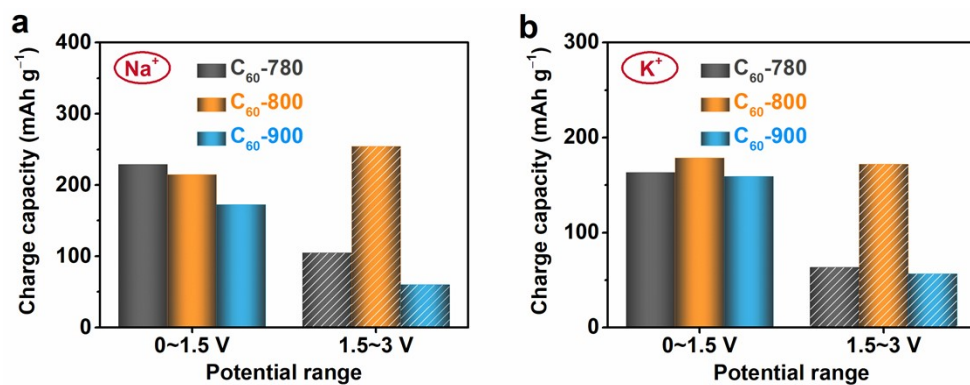

**Fig S9.** The charge capacities of  $C_{60}$ -Ts ( $T = 780, 800,$  and  $900$ ) in  $0.01 \sim 1.5 \text{ V}$  and  $1.5 \sim 3.0 \text{ V}$  for **a**  $\text{Na}^+$  and **b**  $\text{K}^+$  storage.

Table S1. The typical characteristics of C<sub>60</sub>-Ts samples including interlayer distance ( $d_{002}$ ), SSA, and defect degree.  $d_{002}$  represents the interlayer distance of 002 plane based on XRD results;  $S_{\text{BET}}$  is the specific surface area calculated by the Brunauer–Emmett–Teller (BET) method; the defect degree is estimated by the intensity ratio of D band and G band in Raman spectra.

| Sample                | $d_{002}$ | $S_{\text{BET}}$ (m <sup>2</sup> g <sup>-1</sup> ) | Defect degree |
|-----------------------|-----------|----------------------------------------------------|---------------|
| C <sub>60</sub> -780  | 0.48      | 435.2                                              | 0.96          |
| C <sub>60</sub> -800  | 0.44      | 393.3                                              | 1.03          |
| C <sub>60</sub> -900  | 0.40      | 740.4                                              | 1.06          |
| C <sub>60</sub> -1000 | 0.38      | 647.3                                              | 1.10          |

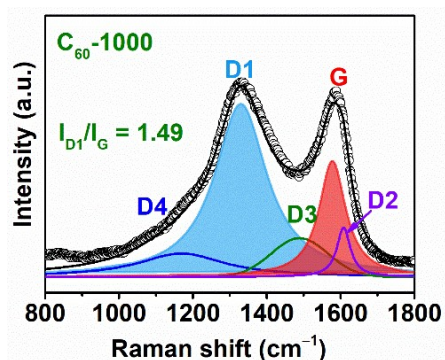

**Fig. S10.** Raman spectra and corresponding fitted curves of the C<sub>60</sub>-1000.

Raman spectra of C<sub>60</sub>-1000 (Fig. S10) show broad D- and G-band peaks, which could be deconvoluted into five peaks with Gaussian-Lorentzian numerical simulation. Similarly, The D1 band (1330 cm<sup>-1</sup>), D2 band (1608 cm<sup>-1</sup>), and D3 band (1489 cm<sup>-1</sup>) could be assigned, respectively, to the A<sub>1g</sub> symmetry vibration of the graphene layer edges, E<sub>2g</sub> symmetry vibration of the surface graphene layers, and the short-range sp<sup>3</sup>-C vibration of the amorphous carbon. The D4 band at 1169 cm<sup>-1</sup> arises from the sp<sup>2</sup>-sp<sup>3</sup> bonds or C–C and C=C stretching vibrations polyene-like structures. The intensity ratio of D1 to G band ( $I_{D1}/I_G$ ) is always used to measure the fraction of the sp<sup>2</sup>-C at the exposed graphene layer edges. The calculated  $I_{D1}/I_G$  of C<sub>60</sub>-1000 is 1.49, demonstrating the percentage of the sp<sup>2</sup>-C in C<sub>60</sub>-800 is the lowest. Besides, the ratio of sp<sup>3</sup> and sp<sup>2</sup>-hybridized carbon of C<sub>60</sub>-1000, estimated by the integral area ratio of fitting Raman spectra, is 0.271, also indicating the highest sp<sup>3</sup>-C fraction of C<sub>60</sub>-800, which agrees with the XPS results as summarized in Fig. 3g.



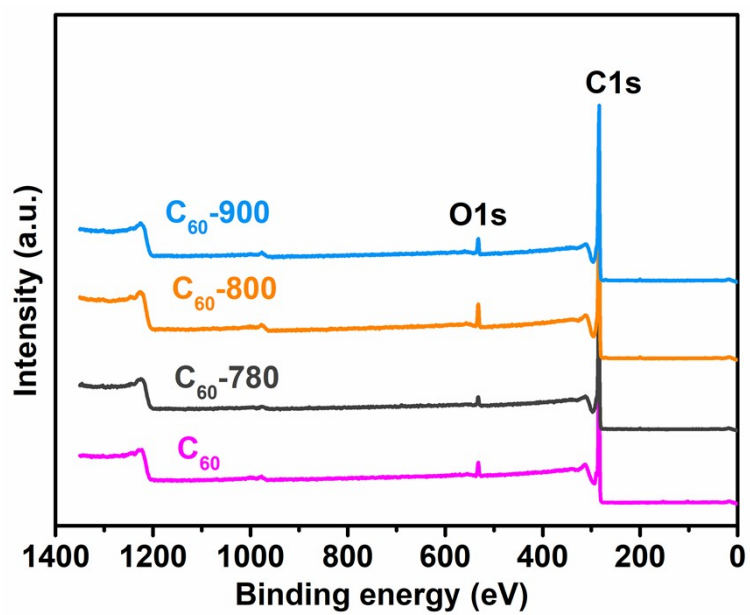

**Fig. S11.** The XPS survey spectra of  $C_{60}$  and  $C_{60}$ -Ts.

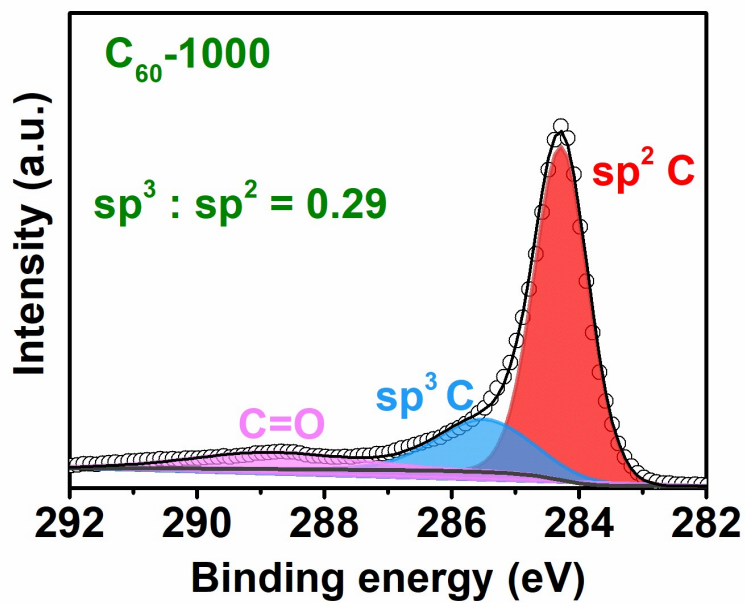

Fig. S12. the high-resolution C1s XPS spectra and corresponding fitted curves of C<sub>60</sub>-1000.

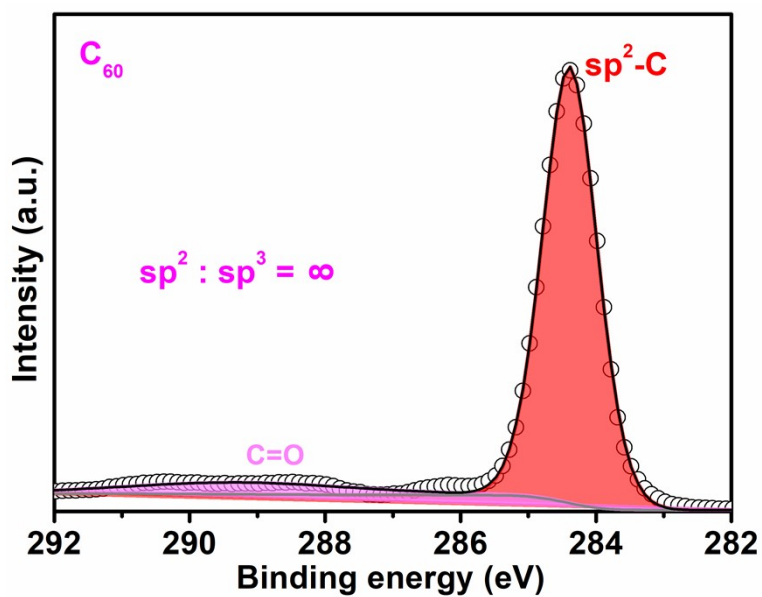

Fig. S13. The high-resolution C1s XPS spectra and corresponding fitted curves of C<sub>60</sub>.

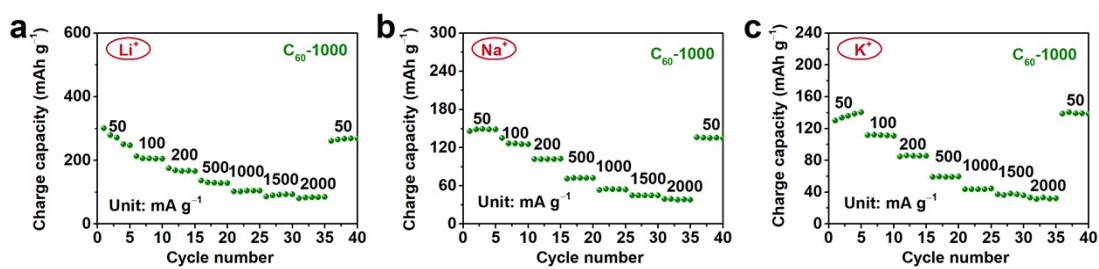

**Fig. S14.** The rate capability of  $C_{60}$ -1000 at current densities of 50, 100, 200, 500, 1000, 1500, and 2000  $\text{mA g}^{-1}$  for **a**  $\text{Li}^+$ , **b**  $\text{Na}^+$ , and **c**  $\text{K}^+$  storage.

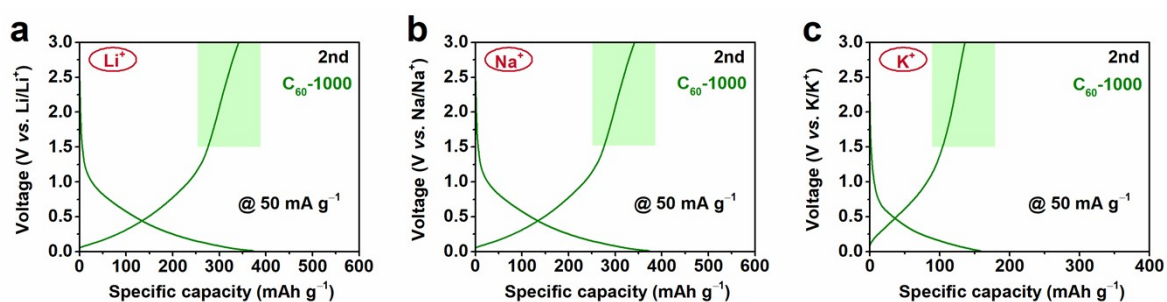

**Fig. S15.** The second charge-discharge curves of  $C_{60}$ -1000 at current densities of 50  $\text{mA g}^{-1}$  for **a**  $\text{Li}^+$ , **b**  $\text{Na}^+$ , and **c**  $\text{K}^+$  storage.

Quantitative analysis of Na<sup>+</sup>-ions storage behaviors in C<sub>60</sub>-Ts (T = 780, 800, and 900).

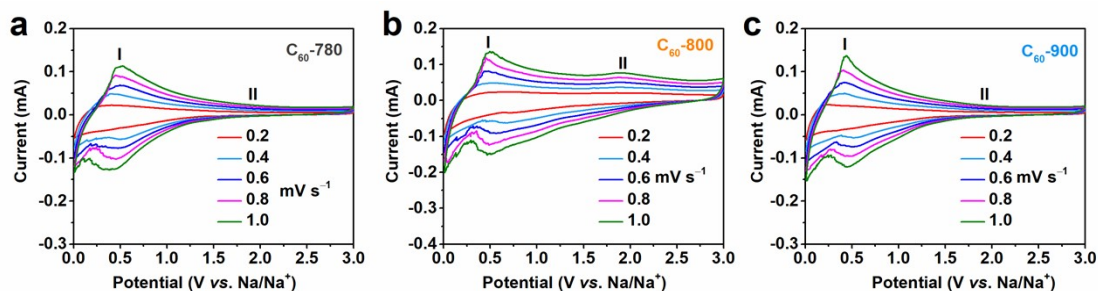

Fig. S16 The CV curves of **a** C<sub>60</sub>-780, **b** C<sub>60</sub>-800, and **c** C<sub>60</sub>-900 at scan rates of 0.1 to 1.0 mV s<sup>-1</sup>.

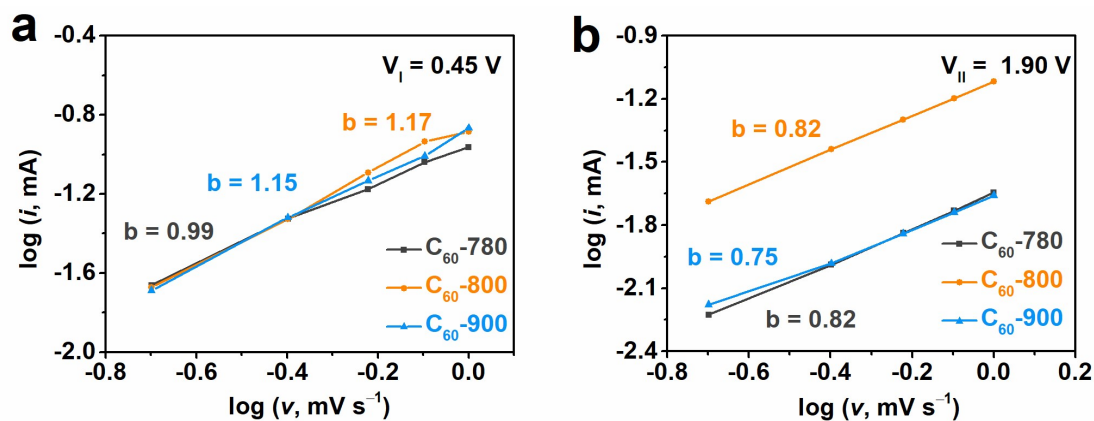

Fig. S17 The Log(*i*)–log(*v*) curves (b-value determination) of C<sub>60</sub>-Ts at **a** 0.45 V and **b** 1.90 V.

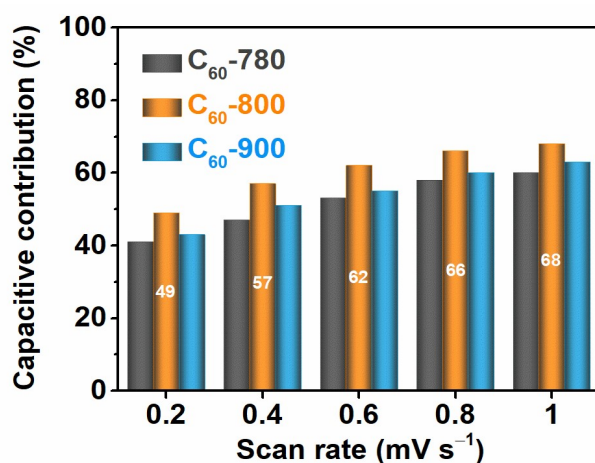

Fig. S18 The capacitive contributions of C<sub>60</sub>-Ts at different scan rates.

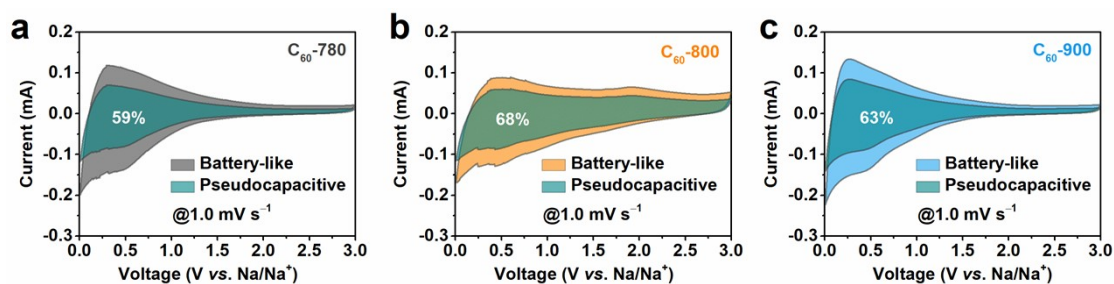

**Fig. S19** The capacitive contribution of **a**  $C_{60}$ -780, **b**  $C_{60}$ -800, and **c**  $C_{60}$ -900 at a scan rate of  $1.0 \text{ mV s}^{-1}$ .

**Quantitative analysis of  $K^+$ -ions storage behaviors in  $C_{60}$ -Ts ( $T = 780, 800, \text{ and } 900$ ).**

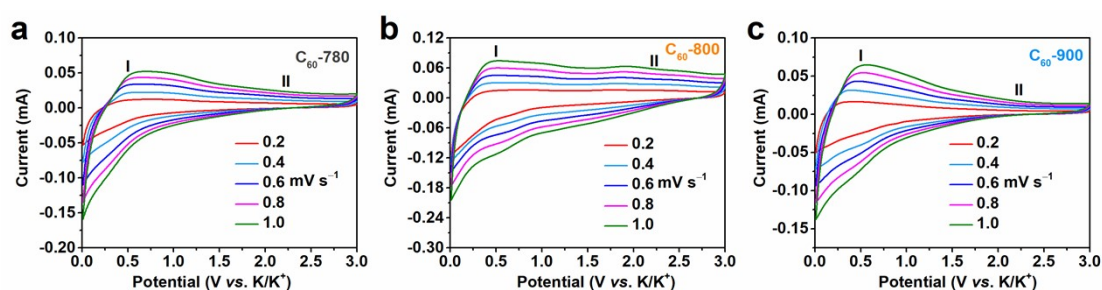

**Fig. S20** The CV curves of **a**  $C_{60}$ -780, **b**  $C_{60}$ -800, and **c**  $C_{60}$ -900 at scan rates of 0.1 to  $1.0 \text{ mV s}^{-1}$ .

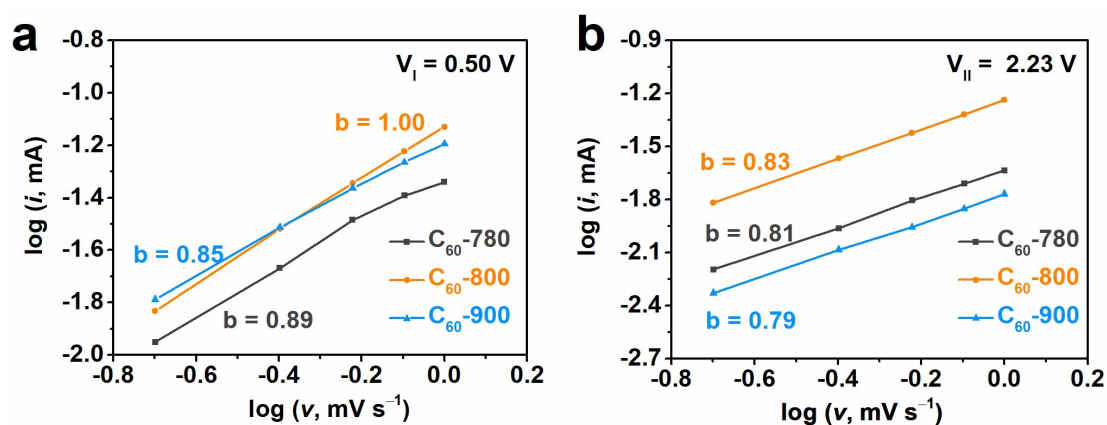

**Fig. S21** The  $\text{Log}(i)$ - $\text{log}(v)$  curves of  $C_{60}$ -Ts at **a**  $0.50 \text{ V}$  and **b**  $2.23 \text{ V}$ .

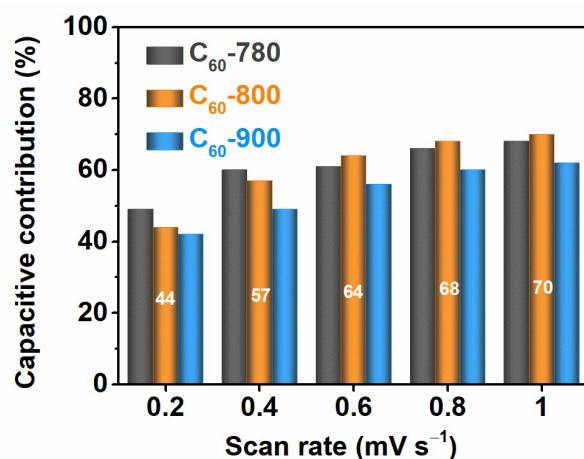

**Fig. S22** The capacitive contributions of the C<sub>60</sub>-Ts at different scan rates.

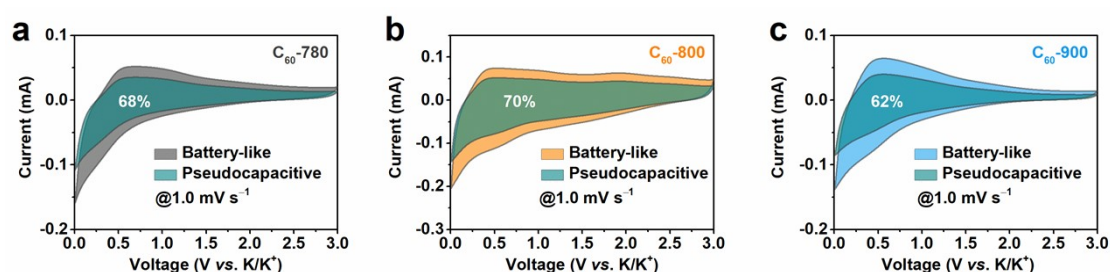

**Fig. S23** The capacitive contribution of **a** C<sub>60</sub>-780, **b** C<sub>60</sub>-800, and **c** C<sub>60</sub>-900 at a scan rate of 1.0 mV s<sup>-1</sup>.

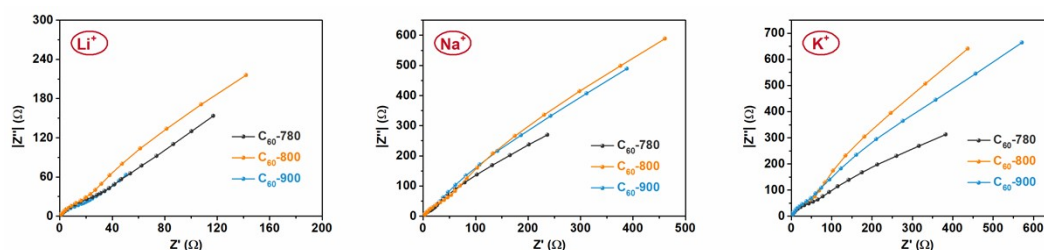

**Fig. S24** The EIS spectra of the C<sub>60</sub>-780, C<sub>60</sub>-800, and C<sub>60</sub>-900 electrodes for (a) Li<sup>+</sup>, (b) Na<sup>+</sup>, (c) K<sup>+</sup> after cycling at a high current density of 2000 mA g<sup>-1</sup>.

Electrochemical impedance spectroscopy (EIS) is a powerful technique for investigating processes occurring in electrochemical systems. Generally, such processes involve the dynamics of bound or mobile charges in the bulk or interfacial regions of solid material. We measured the EIS spectra after cycling at a high current density of 2000 mA g<sup>-1</sup> and added them as shown in Fig. S24. The impedance plots shown in Fig. S24 can be divided into a high-frequency component (partial semicircle) and a low-frequency component (straight sloping line along the imaginary axis). The semicircle in the high-frequency range is associated with the surface properties of the electrode and corresponds to the Faradic charge-

transfer resistance. The charge transfer resistance is directly related to the electroactive surface area (the combination of electrolyte accessible area and electrical conductivity of the electrode materials). It could be seen that the C<sub>60</sub>-800 shows the smallest radius among the three samples. In addition, the low-frequency part is related to the ions diffusion. Thus, the alkali ion diffusion (Li<sup>+</sup>, Na<sup>+</sup>, and K<sup>+</sup>) coefficient, D<sub>ions</sub>, can be calculated from the Warburg region using equation (1): [1. *Energy Environ. Sci.*, **2012**, 5, 9595.; 2. *ACS Appl. Mater. Interfaces*, **2016**, 8, 18788.]

$$D = \frac{R^2 T^2}{2A^2 n^4 F^4 C^2 \sigma_w^2} \#(1)$$

where R is the universal gas constant, T is the absolute temperature, F is the Faraday constant, n is the number of electrons, A is the electrode area of the electrode and C is the concentration of lithium ions in the electrolyte (10<sup>-3</sup> mol cm<sup>-3</sup>). According to equation (2), σ<sub>w</sub> is the Warburg factor, and ω is the angular frequency, which is related to Z' and can be attained from the slope of the fitting line of the EIS data (Fig. 25) at low frequencies: [3. *Energy Storage Materials*, **2018**, 11, 161.]

$$Z' = R_e + R_{ct} + \sigma_w \frac{1}{\sqrt{\omega}} \#(2)$$

The ions diffusion coefficients (D<sub>ions</sub>, cm<sup>2</sup> s<sup>-1</sup>) of all the cells are calculated using equation (1) and (2), which are shown in Table S2. The D<sub>ions</sub> of the C<sub>60</sub>-800 with higher sp<sup>3</sup>-hybridized carbon atoms are higher than that of C<sub>60</sub>-780 and C<sub>60</sub>-900, indicating the existence of sp<sup>3</sup>-hybridized carbon atoms could accelerate the alkali ions diffusions and storage. These results are in accordance with the simulation results.

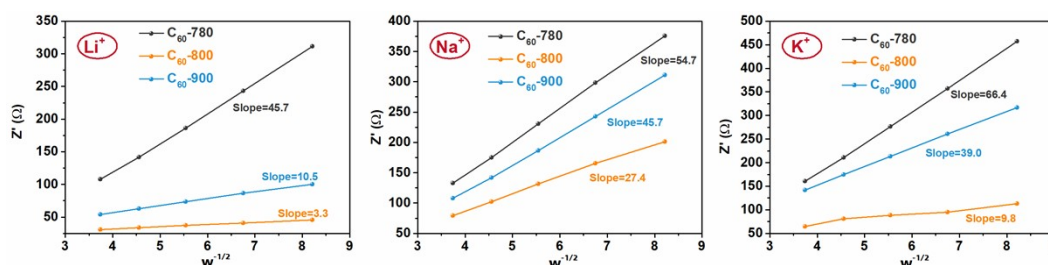

**Fig. S25** Z' as a function of the ω<sup>-1/2</sup> plot in the low frequency range (the slope of fitting curves is the Warburg factor, σ<sub>w</sub>)

**Table S2** The alkion ions ( $\text{Li}^+$ ,  $\text{Na}^+$ , and  $\text{K}^+$ ) diffusion coefficients of  $\text{C}_{60}$ -780,  $\text{C}_{60}$ -800, and  $\text{C}_{60}$ -900 electrodes.

| Sample                                       | $\text{C}_{60}$ -780   | $\text{C}_{60}$ -800   | $\text{C}_{60}$ -900   |
|----------------------------------------------|------------------------|------------------------|------------------------|
| $D_{\text{Li}^+}/\text{cm}^2 \text{ s}^{-1}$ | $2.75 \times 10^{-14}$ | $5.41 \times 10^{-12}$ | $5.20 \times 10^{-13}$ |
| $D_{\text{Na}^+}/\text{cm}^2 \text{ s}^{-1}$ | $1.93 \times 10^{-14}$ | $7.65 \times 10^{-14}$ | $2.75 \times 10^{-14}$ |
| $D_{\text{K}^+}/\text{cm}^2 \text{ s}^{-1}$  | $3.78 \times 10^{-14}$ | $5.96 \times 10^{-13}$ | $1.30 \times 10^{-14}$ |



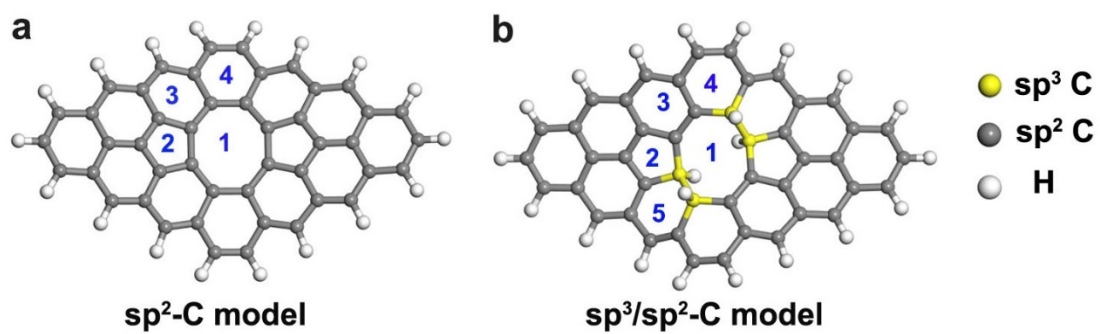

**Fig. S26** The theoretical carbon models and adsorption sites of **a** sp<sup>2</sup>-C and **b** sp<sup>3</sup>/sp<sup>2</sup>-C model.

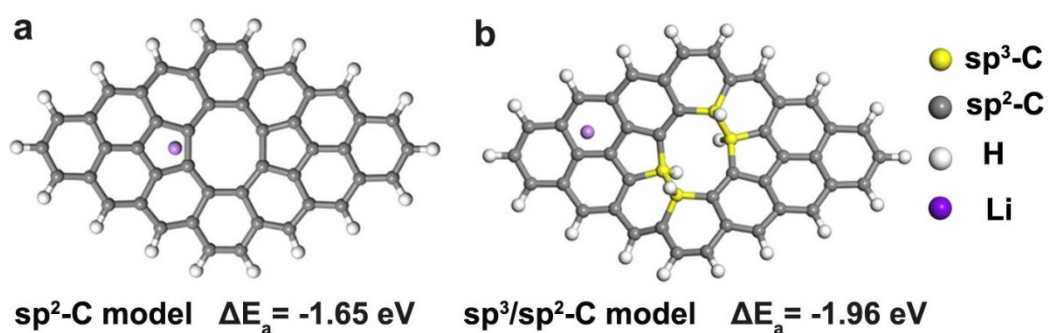

**Fig. S27** The optimized geometry of the **a** sp<sup>2</sup>-C and **b** sp<sup>3</sup>/sp<sup>2</sup>-C model with an adsorbed lithium atom and corresponding adsorption energy.

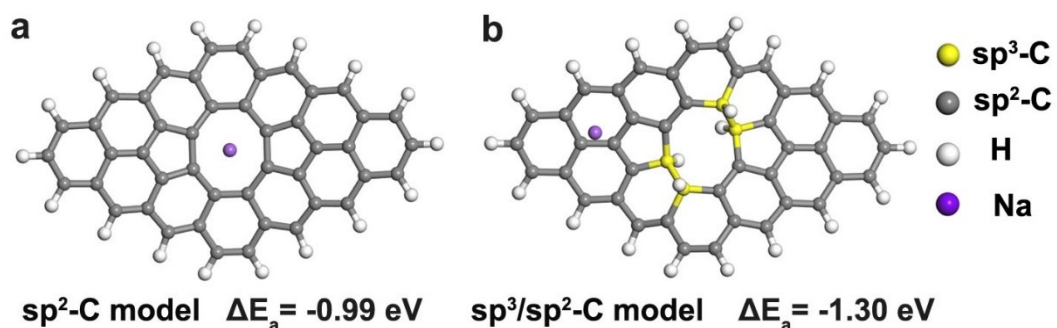

**Fig. S28** The optimized geometry of the **a** sp<sup>2</sup>-C and **b** sp<sup>3</sup>/sp<sup>2</sup>-C model with an adsorbed sodium atom and corresponding adsorption energy.

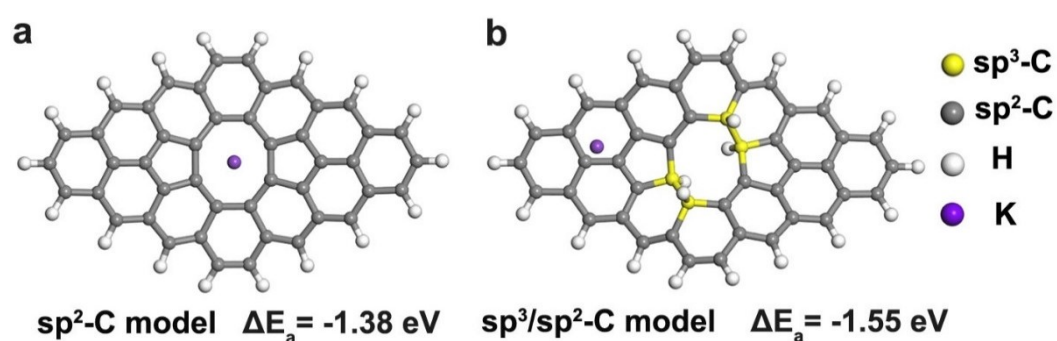

**Fig. S29** The optimized geometry of the **a** sp<sup>2</sup>-C and **b** sp<sup>3</sup>/sp<sup>2</sup>-C model with an adsorbed potassium atom and corresponding adsorption energy.
